# Supplementary material for: Association of NF-κB and AP-1 with MMP-9 Overexpression in 2-Chloroethanol Exposed Rat Astrocytes
Source: MDPI journal article supplement (doi:10.3390/cells7080096), 2018-08-07
Supplement: s1 [file s1]

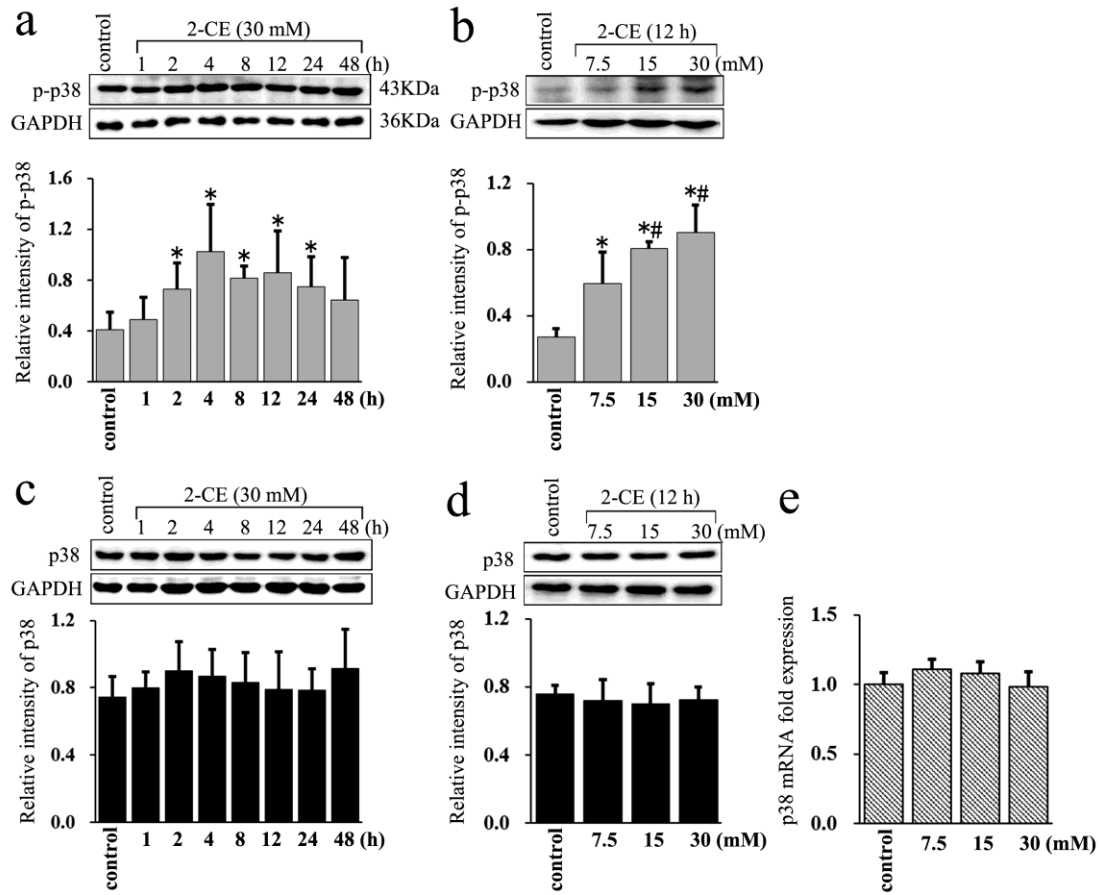

**Figure S1** Alteration in expression and phosphorylation of p38 MAPK in 2-CE exposed rat astrocytes along with the exposure time and 2-CE concentrations
